# Supplementary material
Source: Springer Nature journal article supplement (https://www.springermedizin.de/resource/supplementary/10194_2014_1028_MOESM6_ESM.pdf/9423406)

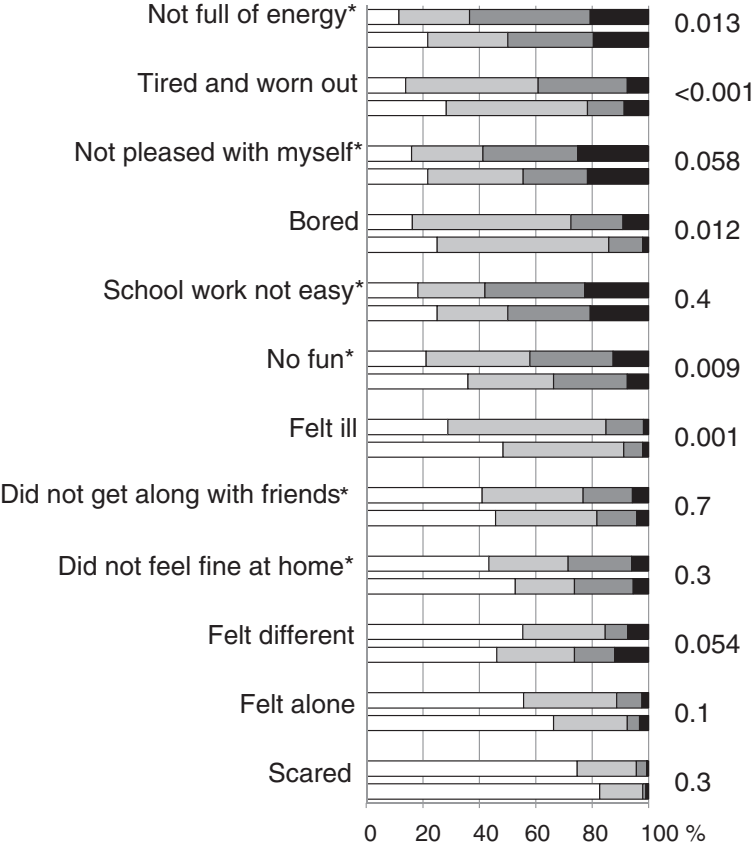

Supplement: MOESM6 [file 9423406]
